# Supplementary material for: Pregnant women who requested a ‘108’ ambulance in two states of India
Source: PubMed Central journal article supplement (PMC5935162; doi:10.1136/bmjgh-2017-000704), 2018-05-03
Supplement: bmjgh-2017-000704supp001.pdf [file bmjgh-2017-000704supp001.pdf]

**Additional file 1: Response to calls made to pregnant women/relatives/others who called '108' service**

|                                       | <b>Total calls made</b> | <b>Caller not reachable</b> | <b>Unable to provide information</b> | <b>Reverse transport</b> | <b>Eligible calls (Sub-total)</b> | <b>Consent not given, n(% of eligible)</b> | <b>Complete interview, n(% of eligible)</b> |
|---------------------------------------|-------------------------|-----------------------------|--------------------------------------|--------------------------|-----------------------------------|--------------------------------------------|---------------------------------------------|
| <b>Andhra Pradesh</b>                 |                         |                             |                                      |                          |                                   |                                            |                                             |
| Transported using ambulance, N(%)     | <b>1207</b>             | 208 (17.2)                  | 185 (15.3)                           | 146 (12.1)               | <b>668 (55.3)</b>                 | 86 (12.9)                                  | 582 (87.1)                                  |
| Ambulance assigned but not used, N(%) | <b>570</b>              | 126 (22.1)                  | 91 (16.0)                            | 80 (14.0)                | <b>273 (47.9)</b>                 | 58 (21.2)                                  | 215 (78.8)                                  |
| Ambulance not assigned, N(%)          | <b>186</b>              | 50 (26.9)                   | 21 (11.3)                            | 17 (9.1)                 | <b>98 (52.7)</b>                  | 24 (24.5)                                  | 74 (75.5)                                   |
| <b>Total, N(%)</b>                    | <b>1963</b>             | <b>384 (19.6)</b>           | <b>297 (15.1)</b>                    | <b>243 (12.4)</b>        | <b>1026 (52.3)</b>                | <b>168 (16.4)</b>                          | <b>858 (83.6)</b>                           |
| <b>Himachal Pradesh</b>               |                         |                             |                                      |                          |                                   |                                            |                                             |
| Transported using ambulance, N(%)     | <b>899</b>              | 119 (13.2)                  | 98 (10.9)                            | 0                        | <b>682 (75.9)</b>                 | 67 (9.8)                                   | 615 (90.2)                                  |
| Ambulance not assigned, N(%)          | <b>170</b>              | 23 (13.5)                   | 21 (12.4)                            | 0                        | <b>126 (74.1)</b>                 | 15 (11.9)                                  | 111 (88.1)                                  |
| <b>Total, N(%)</b>                    | <b>1069</b>             | <b>142 (13.3)</b>           | <b>119 (11.1)</b>                    | <b>0</b>                 | <b>808 (75.6)</b>                 | <b>82 (10.1)</b>                           | <b>726 (89.9)</b>                           |

**Caller not reachable** = Phone number was not reachable or was unanswered even after calling five times over a span of two hours. **Unable to provide information** = Caller who could not provide information about the pregnant women were not included. **Reverse transport** = Mother and child were transported back from hospital to home and were not eligible. **Consent not given** caller refused to participate in the survey.
