# Supplementary material for: Pregnant women who requested a ‘108’ ambulance in two states of India
Source: PubMed Central journal article supplement (PMC5935162; doi:10.1136/bmjgh-2017-000704), 2018-05-03
Supplement: bmjgh-2017-000704supp002.pdf [file bmjgh-2017-000704supp002.pdf]

**Additional file 2: Socio-demographic characteristics of pregnant women who called '108' in the study states**

| Use of ambulance                                                | Andhra Pradesh                           |                                              |                                    | Himachal Pradesh                         |                                     |
|-----------------------------------------------------------------|------------------------------------------|----------------------------------------------|------------------------------------|------------------------------------------|-------------------------------------|
|                                                                 | Transported using ambulance<br>N= 582, % | Ambulance assigned but not used<br>N= 215, % | Ambulance not assigned<br>N= 74, % | Transported using ambulance<br>N= 615, % | Ambulance not assigned<br>N= 111, % |
| <b>Age</b>                                                      |                                          |                                              |                                    |                                          |                                     |
| < 20 years                                                      | 7.0                                      | 6.0                                          | 5.4                                | 3.1                                      | 8.1                                 |
| 20-24 years                                                     | 64.1                                     | 58.6                                         | 66.2                               | 48.1                                     | 45.9                                |
| 25-29 years                                                     | 23.7                                     | 25.6                                         | 21.6                               | 36.4                                     | 36.0                                |
| 30-34 years                                                     | 3.8                                      | 7.0                                          | 2.7                                | 9.4                                      | 6.3                                 |
| ≥ 35 years                                                      | 0.3                                      | 1.9                                          | 0.0                                | 2.9                                      | 3.6                                 |
| Don't know                                                      | 0.5                                      | 0.9                                          | 4.1                                | 0.0                                      | 0.0                                 |
| <b>Social caste</b>                                             |                                          |                                              |                                    |                                          |                                     |
| Other backward caste                                            | 51.4                                     | 56.7                                         | 55.4                               | 13.8                                     | 14.4                                |
| Scheduled caste                                                 | 33.8                                     | 25.1                                         | 24.3                               | 25.7                                     | 27.0                                |
| Scheduled tribe                                                 | 13.9                                     | 14.9                                         | 13.5                               | 5.7                                      | 6.3                                 |
| General                                                         | 0.7                                      | 2.3                                          | 6.8                                | 31.9                                     | 30.6                                |
| Don't know                                                      | 0.2                                      | 0.9                                          | 0.0                                | 22.9                                     | 21.6                                |
| <b>Economic class</b>                                           |                                          |                                              |                                    |                                          |                                     |
| Below poverty line                                              | 93.6                                     | 90.2                                         | 93.2                               | 15.9                                     | 18.9                                |
| Above poverty line                                              | 0.9                                      | 1.4                                          | 0.0                                | 49.3                                     | 45.0                                |
| Don't know                                                      | 5.5                                      | 8.4                                          | 6.8                                | 34.8                                     | 36.0                                |
| <b>Pregnant women worked for earnings during this pregnancy</b> | 45.2                                     | 47.4                                         | 42.3                               | 5.4                                      | 8.1                                 |
| <b>Education status of pregnant women</b>                       |                                          |                                              |                                    |                                          |                                     |
| Illiterate                                                      | 38.0                                     | 43.7                                         | 37.8                               | 9.1                                      | 8.1                                 |
| Primary school                                                  | 12.2                                     | 14.4                                         | 20.3                               | 7.5                                      | 12.6                                |
| Middle school                                                   | 29.0                                     | 21.4                                         | 24.3                               | 39.7                                     | 42.3                                |
| 12 grade                                                        | 9.8                                      | 9.3                                          | 6.8                                | 27.5                                     | 27.9                                |
| Graduate or above                                               | 6.5                                      | 4.2                                          | 5.5                                | 11.5                                     | 7.2                                 |
| Don't know                                                      | 4.5                                      | 7.0                                          | 5.4                                | 4.8                                      | 1.8                                 |
| <b>Education status of husband of pregnant women</b>            |                                          |                                              |                                    |                                          |                                     |
| Illiterate                                                      | 39.0                                     | 43.3                                         | 43.2                               | 4.6                                      | 6.3                                 |
| Primary school                                                  | 11.3                                     | 12.6                                         | 10.8                               | 7.2                                      | 7.2                                 |
| Middle school                                                   | 23.2                                     | 23.2                                         | 28.4                               | 43.4                                     | 47.7                                |
| 12 <sup>th</sup>                                                | 5.8                                      | 4.2                                          | 1.4                                | 29.6                                     | 26.1                                |
| Graduate or above                                               | 12.7                                     | 7.5                                          | 9.5                                | 9.9                                      | 11.7                                |
| Don't know                                                      | 7.9                                      | 9.3                                          | 6.8                                | 5.4                                      | 0.9                                 |
| <b>Religion</b>                                                 |                                          |                                              |                                    |                                          |                                     |
| Hindu                                                           | 69.1                                     | 72.1                                         | 70.3                               | 95.3                                     | 99.1                                |
| Muslim                                                          | 0.9                                      | 2.3                                          | 6.8                                | 4.1                                      | 0.9                                 |
| Others                                                          | 29.9                                     | 24.2                                         | 23.0                               | 0.5                                      | 0.0                                 |
| Don't know                                                      | 0.2                                      | 1.4                                          | 0.0                                | 0.2                                      | 0.0                                 |
| <b>Area</b>                                                     |                                          |                                              |                                    |                                          |                                     |
| Rural                                                           | 84.5                                     | 87.4                                         | 85.1                               | 94.5                                     | 75.7                                |
| Tribal                                                          | 6.5                                      | 5.1                                          | 2.7                                | 4.2                                      | 22.5                                |
| Urban                                                           | 8.9                                      | 7.4                                          | 12.2                               | 1.3                                      | 1.8                                 |

Chi-square test of proportions used for comparisons between groups, within each of the states. All comparisons had p values < 0.05, except the variable Area in HP where p value was less than <0.001.
