# Supplementary material for: Pregnant women who requested a ‘108’ ambulance in two states of India
Source: PubMed Central journal article supplement (PMC5935162; doi:10.1136/bmjgh-2017-000704), 2018-05-03
Supplement: bmjgh-2017-000704supp003.pdf [file bmjgh-2017-000704supp003.pdf]

**Additional file 3: Details on high-risk pregnancy, early complication in pregnancy and obstetric emergency**

| Use of ambulance                                                                           | Andhra Pradesh                           |                                              |                                    | Himachal Pradesh                         |                                     |
|--------------------------------------------------------------------------------------------|------------------------------------------|----------------------------------------------|------------------------------------|------------------------------------------|-------------------------------------|
|                                                                                            | Transported using ambulance<br>N= 582, % | Ambulance assigned but not used<br>N= 215, % | Ambulance not assigned<br>N= 74, % | Transported using ambulance<br>N= 615, % | Ambulance not assigned<br>N= 111, % |
| <b>High risk in current Pregnancy</b>                                                      |                                          |                                              |                                    |                                          |                                     |
| Age < 20                                                                                   | 7.0                                      | 6.0                                          | 5.4                                | 3.1                                      | 8.1                                 |
| Primigravida >35                                                                           | 0.1                                      | 0.0                                          | 0.0                                | 0.9                                      | 2.5                                 |
| Height < 150 cm                                                                            | 5.2                                      | 2.8                                          | 1.4                                | 13.5                                     | 7.2                                 |
| >= 4 pregnancies                                                                           | 3.3                                      | 3.3                                          | 5.4                                | 0.02                                     | 0.0                                 |
| History of medical illness                                                                 | 0.0                                      | 0.0                                          | 0.0                                | 3.6                                      | 2.8                                 |
| History of complications in previous pregnancy/ pregnancies (women with gravida 2 or more) |                                          |                                              |                                    |                                          |                                     |
|                                                                                            | <b>N=315, %</b>                          | <b>N=130, %</b>                              | <b>N=42, %</b>                     | <b>N=287, %</b>                          | <b>N=35, %</b>                      |
| Birth by operation over abdomen                                                            | 16.5                                     | 7.1                                          | 9.5                                | 13.6                                     | 6.5                                 |
| Obstructed labour                                                                          | 0.7                                      | 1.6                                          | 0.0                                | 0.0                                      | 0.0                                 |
| High blood pressure                                                                        | 0.0                                      | 0.8                                          | 0.0                                | 0.0                                      | 0.0                                 |
| Convulsions/ fits                                                                          | 0.0                                      | 0.0                                          | 0.0                                | 0.0                                      | 0.0                                 |
| High sugar                                                                                 | 0.3                                      | 0.0                                          | 0.0                                | 0.7                                      | 0.0                                 |
| Neonatal death                                                                             | 2.3                                      | 3.9                                          | 4.8                                | 0.0                                      | 0.0                                 |
| 3 or more consecutive abortions/ still births                                              | 0.3                                      | 0.0                                          | 0.0                                | 0.3                                      | 0.0                                 |
| Premature births                                                                           | 1.7                                      | 0.0                                          | 0.0                                | 0.0                                      | 0.0                                 |
| Multiple pregnancies                                                                       | 0.0                                      | 0.0                                          | 0.0                                | 0.3                                      | 0.0                                 |
|                                                                                            | <b>N= 582, %</b>                         | <b>N= 215, %</b>                             | <b>N= 74, %</b>                    | <b>N= 615, %</b>                         | <b>N= 111, %</b>                    |
| <b>Any high risk in current pregnancy</b>                                                  | <b>22.2</b>                              | <b>17.7</b>                                  | <b>18.9</b>                        | <b>27.0</b>                              | <b>18.9</b>                         |
| <b>Early complication in pregnancy or post-delivery</b>                                    |                                          |                                              |                                    |                                          |                                     |
| <b>History of complication in current pregnancy</b>                                        |                                          |                                              |                                    |                                          |                                     |
| Haemoglobin < 7 gm%                                                                        | 13.2                                     | 6.5                                          | 6.8                                | 9.8                                      | 11.7                                |
| High BP                                                                                    | 2.1                                      | 2.8                                          | 1.4                                | 2.4                                      | 0.9                                 |
| Convulsions/ fits                                                                          | 0.3                                      | 0.0                                          | 0.0                                | 0.0                                      | 0.9                                 |
| High sugar                                                                                 | 0.3                                      | 0.0                                          | 0.0                                | 0.5                                      | 0.0                                 |
| Bleeding from vagina                                                                       | 0.9                                      | 0.0                                          | 0.0                                | 1.0                                      | 0.9                                 |
| High fever                                                                                 | 0.5                                      | 0.0                                          | 0.0                                | 4.1                                      | 1.8                                 |
| Foul smelling discharge from vagina                                                        | 0.3                                      | 0.0                                          | 0.0                                | 0.5                                      | 0.9                                 |
| Others                                                                                     | 0.2                                      | 0.0                                          | 0.0                                | 1.8                                      | 0.0                                 |
| <b>Any early complication in current pregnancy</b>                                         | <b>16.2</b>                              | <b>8.4</b>                                   | <b>8.1</b>                         | <b>15.9</b>                              | <b>16.0</b>                         |
| <b>Emergency in pregnancy or delivery or post-delivery</b>                                 |                                          |                                              |                                    |                                          |                                     |
| <b>Obstetric emergency in pregnancy</b>                                                    |                                          |                                              |                                    |                                          |                                     |
| Bleeding in pregnancy                                                                      | 1.0                                      | 0.9                                          | 0.0                                | 0.0                                      | 0.0                                 |
| High fever                                                                                 | 0.7                                      | 0.7                                          | 0.0                                | 0.3                                      | 0.0                                 |
| Ectopic pregnancy/rupture                                                                  | 0.7                                      | 0.9                                          | 0.0                                | 0.0                                      | 0.0                                 |
| High BP/ convulsions                                                                       | 0.5                                      | 0.0                                          | 0.0                                | 0.2                                      | 0.0                                 |
| Foul smelling discharge                                                                    | 0.5                                      | 0.0                                          | 0.0                                | 0.7                                      | 0.9                                 |
| Foetal distress                                                                            | 0.5                                      | 0.7                                          | 0.0                                | 0.0                                      | 0.0                                 |
| Excessive vomiting                                                                         | 0.0                                      | 0.0                                          | 0.0                                | 0.7                                      | 0.0                                 |
| <b>Obstetric emergency during delivery</b>                                                 |                                          |                                              |                                    |                                          |                                     |
| Pre-term labour                                                                            | 2.1                                      | 4.2                                          | 0.2                                | 0.2                                      | 0.0                                 |
| Moderate to Severe anaemia                                                                 | 1.5                                      | 0.5                                          | 0.0                                | 0.0                                      | 0.0                                 |
| Excessive bleeding                                                                         | 1.0                                      | 1.4                                          | 0.0                                | 5.0                                      | 4.5                                 |
| High BP/ convulsions                                                                       | 0.9                                      | 3.3                                          | 1.4                                | 1.3                                      | 0.0                                 |
| High fever                                                                                 | 0.0                                      | 0.0                                          | 0.0                                | 0.8                                      | 0.0                                 |
| Multiple foetus/ Malpresentation                                                           | 0.2                                      | 0.5                                          | 0.0                                | 0.2                                      | 0.0                                 |
| Others                                                                                     | 0.7                                      | 0.9                                          | 0.0                                | 0.2                                      | 0.0                                 |
| <b>Any Obstetric emergency at time of call</b>                                             | <b>7.4</b>                               | <b>9.8</b>                                   | <b>4.1</b>                         | <b>9.3</b>                               | <b>5.4</b>                          |
