# Supplementary material for: Pregnant women who requested a ‘108’ ambulance in two states of India
Source: PubMed Central journal article supplement (PMC5935162; doi:10.1136/bmjgh-2017-000704), 2018-05-03

**Additional Figure 1: Follow up of pregnant women who were transported using '108' ambulance with their outcomes in state of Andhra Pradesh**

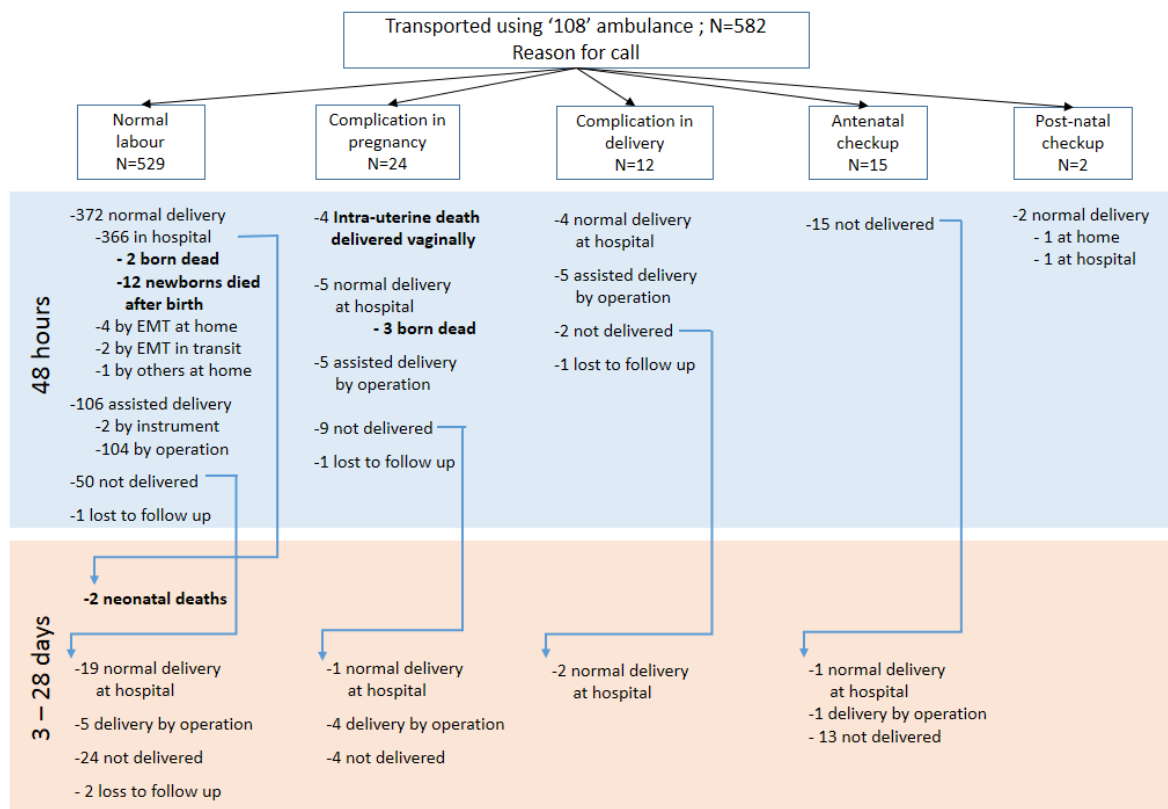

**Additional Figure 2: Follow up of pregnant women who were not transported by '108' ambulance with their outcomes in state of Andhra Pradesh**

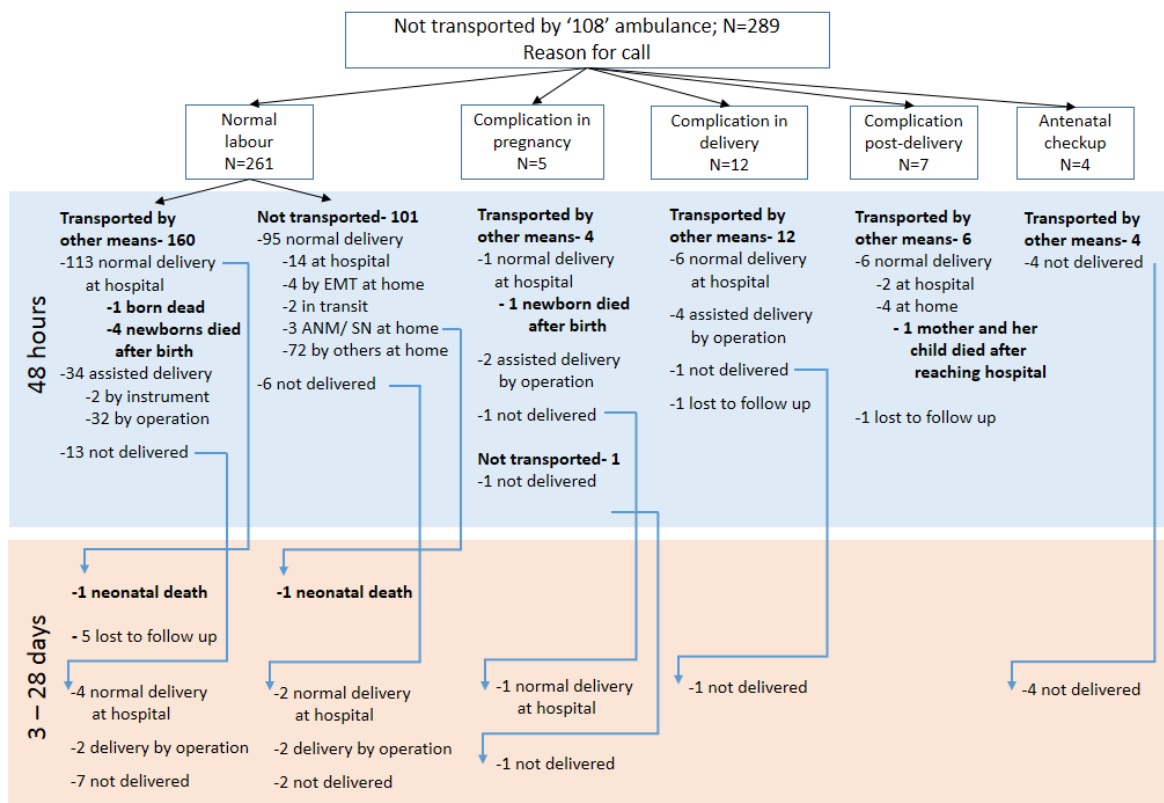

**Additional Figure 3: Follow up of pregnant women who were transported using '108' ambulance and who were not transported by '108' ambulance with their outcomes in state of Himachal Pradesh**

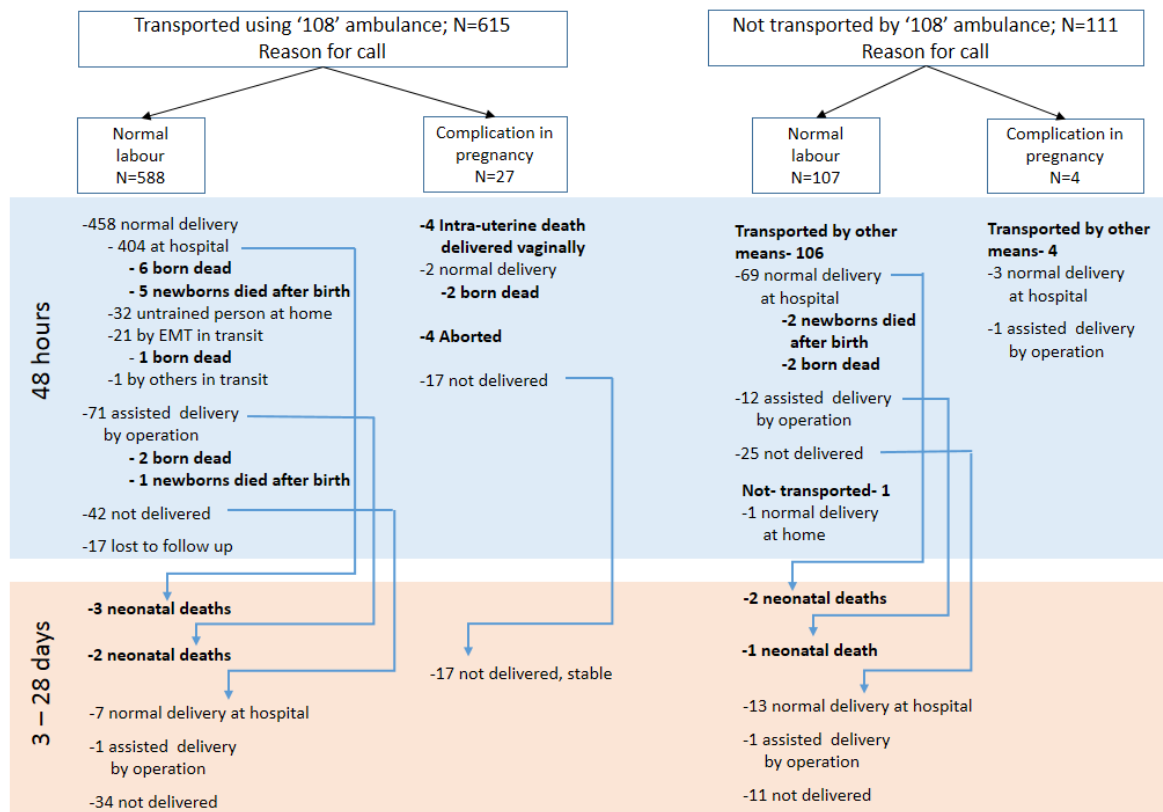

Supplement: bmjgh-2017-000704supp004.pdf [file bmjgh-2017-000704supp004.pdf]
